# Supplementary material for: Radiolytic activation of a cytarabine prodrug possessing a 2-oxoalkyl group: one-electron reduction and cytotoxicity characteristics
Source: Royal Society of Chemistry journal article supplement (doi:10.1039/b816194a), 2008-12-17
Supplement: b816194a.pdf [file b816194a.pdf]

## Electronic Supplementary Information

Radiolytic activation of cytarabine prodrug possessing 2-oxoalkyl group:  
one-electron reduction and cytotoxicity characteristics

Nao Hirata,<sup>†</sup> Yusuke Fujisawa,<sup>†</sup> Kazuhito Tanabe,<sup>\*,†</sup> Hiroshi Harada,<sup>‡,#</sup> Masahiro Hiraoka<sup>‡,#</sup>  
and Sei-ichi Nishimoto<sup>\*,†</sup>

<sup>†</sup>*Department of Energy and Hydrocarbon Chemistry, Graduate School of Engineering, Kyoto University, Katsura Campus, Kyoto 615-8510, Japan*

<sup>‡</sup>*Department of Radiation Oncology and Image-applied Therapy, Graduate School of Medicine, Kyoto University, Kyoto 606-8507, Japan*

<sup>#</sup>*Nano-medicine Merger Education Unit, Kyoto University, Kyoto 606-8507, Japan*

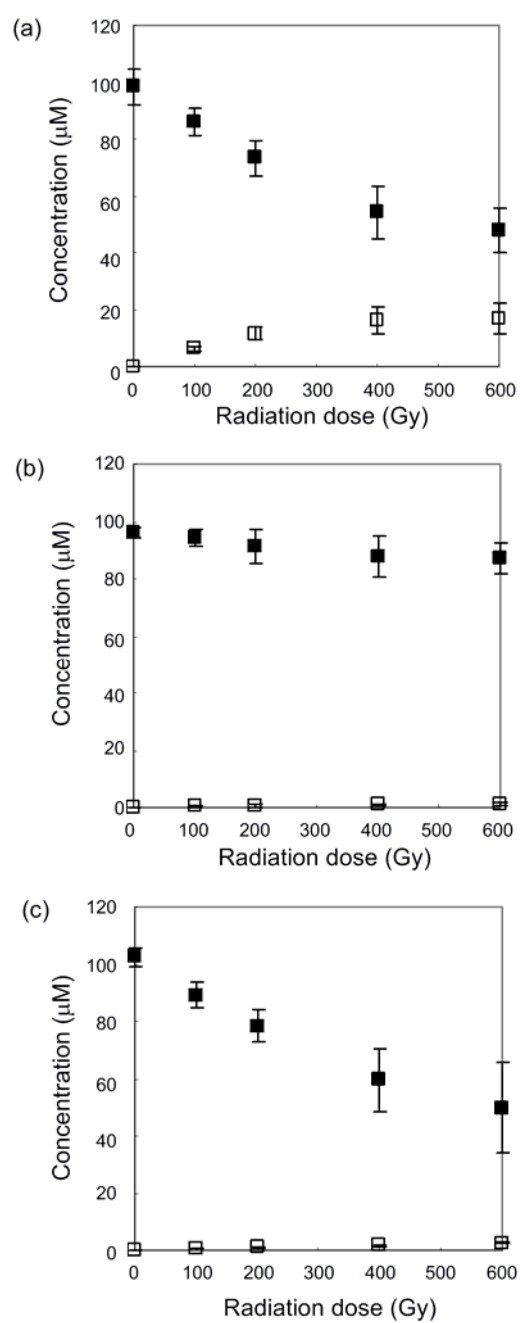

**Fig. S1.** Radiolytic reduction of 100  $\mu\text{M}$  **oxo-ara-C** (closed square) to release **ara-C** (open square)

in hypoxic (a), aerobic (b) and  $\text{N}_2\text{O}$ -saturated (c) aqueous solutions containing 2-methyl-2-propanol

(10 mM)

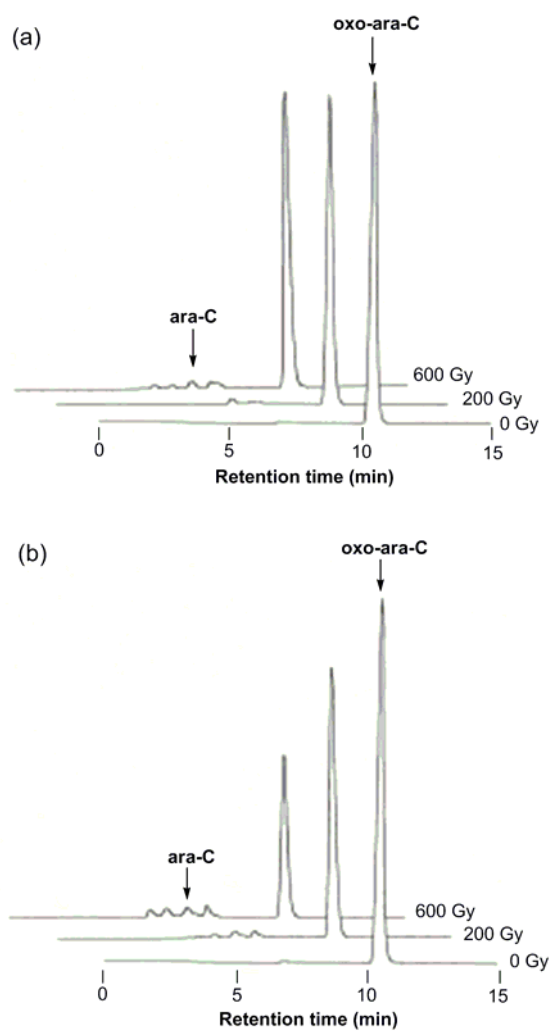

**Fig. S2.** HPLC profiles for the X-radiolysis (0, 200, and 600 Gy) of **oxo-ara-C** (100 μM) in aerobic (a) and N<sub>2</sub>O-saturated (b) aqueous solutions containing 2-methyl-2-propanol (10 mM)
